# Supplementary material
Source: ML conference proceedings conference paper supplement (https://openreview.net/forum?id=GsM2qJTAg-)
Supplement: supplementary_material [file attachment]

Table 1: Summary of notations.

| Variable                                                    | Meaning                                                            |
|-------------------------------------------------------------|--------------------------------------------------------------------|
| $n$                                                         | Number of training samples                                         |
| $T$                                                         | Number of testing samples                                          |
| $d$                                                         | Degrees of freedom (one HGP for each)                              |
| $\alpha$                                                    | $ \psi_j(t)  \leq \alpha$ (cf. Assumption 4.2)                     |
| $\kappa$                                                    | $k(t, t') \leq \kappa$ (cf. Assumption 4.1)                        |
| $\nu$                                                       | $\nu = \max_{1 \leq j \leq d} \ \frac{1}{\sqrt{n}} \mathbf{y}_j\ $ |
| $\Sigma_{\text{noise}} \in \mathbb{R}^{n \times n}$         | Diagonal time-varying noise variance at training points            |
| $R = \Sigma_{\text{noise}}/n$                               | Normalized noise variance at training points                       |
| $\sigma_{\text{noise}, t^*}^2 \in \mathbb{R}$               | Noise variance at testing point $t^*$                              |
| $r_{t^*}^2 = \sigma_{\text{noise}, t^*}^2/n$                | Normalized noise variance at testing point $t^*$                   |
| $0 < \gamma < 1$                                            | $R_{ii} > \gamma, 1 \leq i \leq n$                                 |
| $S : \mathcal{H} \rightarrow \mathbb{R}^n$                  | Sampling operator with normalization $n^{-1/2}$                    |
| $L = SS^* = K/n \in \mathbb{R}^{n \times n}$                | Normalized Gram matrix with exact kernel                           |
| $L_R \in \mathbb{R}^{n \times n}$                           | $L_R = L + R$                                                      |
| $\psi_j(t) = \psi(\omega_j, t)$                             | Element of approximate feat. vector                                |
| $\tilde{\phi}(t) = m^{-1/2}[\psi_1(t), \dots, \psi_m(t)]^T$ | Approximate feat. vector                                           |
| $S_m : \mathbb{R}^m \rightarrow \mathbb{R}^n$               | Sampling operator with normalization $n^{-1/2}$                    |
| $L_m = S_m S_m^* = \tilde{K}/n \in \mathbb{R}^{n \times n}$ | Normalized Gram matrix with RF kernel                              |
| $L_{m,R} \in \mathbb{R}^{n \times n}$                       | $L_{m,R} = L_m + R$                                                |

## A HGP Posterior Equations Revisited

In this section, we will rewrite the exact and approximated HGP posterior equations from Section 2 in terms of standard linear operators used in RKHS theory. For a linear operator  $A$ , we denote its adjoint by  $A^*$ . Let  $\mathcal{H}$  be the RKHS associated to the kernel of interest. In order to retrieve a suitable expression, we denote  $S : \mathcal{H} \rightarrow \mathbb{R}^n$  the sampling operator defined as  $Sf := \frac{1}{\sqrt{n}}[f(t_1), \dots, f(t_n)]^T$ . Moreover, the adjoint of the sampling operator is defined as  $S^* : \mathbb{R}^n \rightarrow \mathcal{H} : S^* \mathbf{a} = \frac{1}{\sqrt{n}} \sum_{i=1}^n a_i k(t_i, \cdot)$ ,  $a_i$  being the  $i$ -th entry of  $\mathbf{a}$ . Now, let  $L : \mathbb{R}^n \rightarrow \mathbb{R}^n, L := SS^*$ . Note that  $K = nL$ . Let  $R = \frac{1}{n} \Sigma_{\text{noise}}$ , let  $r_{t^*} = \frac{1}{n} \sigma_{\text{noise}, t^*}^2$ . Lastly, let  $\langle \cdot, \cdot \rangle_{\mathbb{R}^n}$  denote the inner product of  $n$ -dimensional vectors. With this notation, let us consider a single DOF of the trajectory to be processed. The posterior mean of the associated exact HGP from Equation (1) is

$$\mu_{\text{post}}(t^*) = \left\langle (L + R)^{-1} S k(t^*, \cdot), \frac{1}{\sqrt{n}} \mathbf{y} \right\rangle_{\mathbb{R}^n}. \quad (7)$$

Moreover, the posterior variance from Equation (2) is given by

$$\sigma_{\text{post}}^2(t^*) = k(t^*, t^*) + n r_{t^*} - \langle S k(t^*, \cdot), (L + R)^{-1} S k(t^*, \cdot) \rangle_{\mathbb{R}^n}. \quad (8)$$

Considering RFs, we can define the operator  $S_m : \mathbb{R}^m \rightarrow \mathbb{R}^n, S_m := \frac{1}{\sqrt{n}}[\tilde{\phi}(t_1), \dots, \tilde{\phi}(t_n)]^T$ , and  $L_m : \mathbb{R}^n \rightarrow \mathbb{R}^n, L_m := S_m S_m^*$ . With this notation, let us consider a single DOF of the trajectory to be processed. The RF-based posterior mean of the associated HGP from Equation (4) can be rewritten as

$$\tilde{\mu}_{\text{post}}(t^*) = \left\langle (L_m + R)^{-1} S_m \tilde{\phi}(t^*), \frac{1}{\sqrt{n}} \mathbf{y} \right\rangle_{\mathbb{R}^n}. \quad (9)$$

On the other hand, the RF-based posterior variance from Equation (5) is given by

$$\tilde{\sigma}_{\text{post}}^2(t^*) = \tilde{k}(t^*, t^*) + n r_{t^*} - \langle S_m \tilde{\phi}(t^*), (L_m + R)^{-1} S_m \tilde{\phi}(t^*) \rangle_{\mathbb{R}^n}. \quad (10)$$

A summary of the main operators and constants that will appear in the proofs can be found in Table 1.

418 **Fast matrix inversion** By definition, the operators  $L_m$  and  $S_m$  are matrices. The inversion of  
 419 the matrix  $L_m + R$  appearing in Equations (9) and (10) can be performed by means of Woodbury  
 420 identity [29], as follows:

$$L_{m,R}^{-1} = (S_m S_m^* + R)^{-1} \quad (11)$$

$$= R^{-1} - R^{-1} S_m (I + S_m^* R^{-1} S_m)^{-1} S_m^* R^{-1}. \quad (12)$$

421 The latter expression involves inverting an  $m \times m$  matrix, which boosts the speed of the HGP  
 422 posterior calculation if  $m \ll n$ .

## 423 B Proofs of the Main Results

424 In this appendix, we report the proofs of the two main theoretical results of our paper, along with  
 425 some technical propositions that will be extensively used. In the following, we denote by  $A_R$  the  
 426 operator  $A + R$ , with  $R$  diagonal positive definite matrix, and by  $A_\gamma$  the operator  $A + \gamma I$ . Moreover,  
 427 in the remainder,  $\|\cdot\|$  denotes the operator norm, while  $\|\cdot\|_2$  denotes the Euclidean norm of a vector.

### 428 B.1 Useful Propositions

429 In this part, we report three propositions that will be useful in the proofs.

430 **Proposition B.1** (Proposition 8 of [25]). *Let  $\mathcal{H}$  be a separable Hilbert space,  $A, B$  be two bounded  
 431 self-adjoint positive linear operators on  $\mathcal{H}$ , and  $\lambda > 0$ . Then*

$$\|A_\lambda^{-1/2} B^{1/2}\| \leq \|A_\lambda^{-1/2} B_\lambda^{1/2}\| \leq \frac{1}{(1-\beta)^{1/2}}, \quad (13)$$

432 where

$$\beta = \lambda_{\max} \left[ B_\lambda^{-1/2} (B - A) B_\lambda^{-1/2} \right]. \quad (14)$$

433

434 **Proposition B.2.** *Let  $S_m : \mathbb{R}^m \rightarrow \mathbb{R}^n$ ,  $S_m := \frac{1}{\sqrt{n}} [\tilde{\phi}(t_1) \dots \tilde{\phi}(t_n)]^T$ , and assume that the entries  
 435 of the RF vectors are bounded, that is,  $|\psi_j(t)| \leq \alpha, \forall j \in \{1, \dots, m\}$ . Then,*

$$\|S_m\| \leq \alpha. \quad (15)$$

436

437 *Proof.* The result follows from the definition of operator norm:

$$\|S_m\| = \sup_{\mathbf{a} \in \mathbb{R}^n, \|\mathbf{a}\|_2 \leq 1} \|S_m \mathbf{a}\|_2 \quad (16)$$

$$= \sup_{\mathbf{a} \in \mathbb{R}^n, \|\mathbf{a}\|_2 \leq 1} \frac{1}{\sqrt{n}} \sqrt{\langle \tilde{\phi}(t_1), \mathbf{a} \rangle_2^2 + \dots + \langle \tilde{\phi}(t_n), \mathbf{a} \rangle_2^2} \quad (17)$$

$$\leq \frac{1}{\sqrt{n}} \sqrt{n\alpha^2} = \alpha, \quad (18)$$

438 as reported in the statement.  $\square$

439 **Proposition B.3.** *Let  $A$  be a bounded positive semi-definite operator, and let  $A_R := A + R$ , with  $R$   
 440 diagonal positive definite and  $A_\gamma = A + \gamma I$ . Lastly, assume all entries in  $R$  are greater or equal to  
 441  $\gamma$ . Then,*

$$\|A_R^{-1/2} A_\gamma^{1/2}\| \leq 1. \quad (19)$$

442 *Proof.* Noting that  $A_R - A_\gamma = (R - \gamma I) \succcurlyeq 0$  by hypothesis, it holds  $A_\gamma \preccurlyeq A_R$  and thus

$$\|A_R^{-1/2} A_\gamma^{1/2}\|^2 = \|A_R^{-1/2} A_\gamma A_R^{-1/2}\| \leq \|I\| = 1. \quad (20)$$

443  $\square$

## 444 B.2 Proof of Theorem 4.4 (Deviation of Approximate Posterior Mean)

445 We report here the proof of Theorem 4.4. We start by considering a single DOF, and generalize to  
 446 a  $d$ -valued GP at the end of this section. We begin by proving a lemma that will be used to retrieve  
 447 the main result.

448 **Lemma B.4.** *Let  $m \geq 8 \left( \frac{1}{3} + \frac{\alpha^2}{\gamma} \right) \log \left( \frac{8\kappa^2}{\gamma\delta} \right)$ , and  $\delta = (0, 1]$ . Then, the following bound holds, with  
 449 probability at least  $1 - \delta$ ,*

$$\|(L_{m,R}^{-1} - L_R^{-1})Sk(t^*, \cdot)\|_2 \leq \frac{\sqrt{2}\kappa}{\sqrt{\gamma}} \left[ \frac{2 \log \frac{8\kappa^2}{\gamma\delta} (1 + \alpha^2/\gamma)}{3m} + \sqrt{\frac{2 \log \frac{8\kappa^2}{\gamma\delta} \alpha^2}{\gamma m}} \right]. \quad (21)$$

450

451 *Proof.* In order to bound the term of interest, we can use the fact that, for any invertible matrices  $A$   
 452 and  $B$ ,  $A^{-1} - B^{-1} = A^{-1}(I - AB^{-1}) = A^{-1}(B - A)B^{-1}$ , and Proposition B.3, as follows:

$$\|(L_{m,R}^{-1} - L_R^{-1})Sk(t^*, \cdot)\|_2 \quad (22)$$

$$= \|L_{m,R}^{-1}(L_R - L_{m,R})L_R^{-1}Sk(t^*, \cdot)\|_2 \quad (23)$$

$$= \|L_{m,R}^{-1/2} L_{m,R}^{-1/2} L_{m,\gamma}^{1/2} L_{m,\gamma}^{-1/2} L_\gamma^{1/2} L_\gamma^{-1/2} (L - L_m) L_R^{-1} Sk(t^*, \cdot)\|_2 \quad (24)$$

$$\leq \frac{1}{\sqrt{\gamma}} \|L_{m,R}^{-1/2} L_{m,\gamma}^{1/2}\| \|L_{m,\gamma}^{-1/2} L_\gamma^{1/2}\| \|L_\gamma^{-1/2} (L - L_m) L_R^{-1} Sk(t^*, \cdot)\|_2 \quad (25)$$

$$\leq \frac{\kappa}{\sqrt{\gamma}} \|L_{m,\gamma}^{-1/2} L_\gamma^{1/2}\| \|L_\gamma^{-1/2} (L - L_m) L_\gamma^{-1/2}\| \|L_R^{-1/2} S\|. \quad (26)$$

453 We can now proceed to bound each of the three factors. To start off, let us consider  $\|L_R^{-1/2} S\|$ . This  
 454 term can be bounded by using the *polar decomposition* of the bounded linear operator  $S$ , as follows.  
 455 Let  $S = (SS^*)^{1/2}U$ , where  $U$  is a partial isometry. By Proposition B.3, the definition of polar  
 456 decomposition, and by considering that  $L \preceq L_\gamma$  by definition,

$$\|L_R^{-1/2} S\| = \|L_R^{-1/2} (SS^*)^{1/2} U\| \quad (27)$$

$$\leq \|L_R^{-1/2} L^{1/2}\| \|U\| \quad (28)$$

$$\leq \|L_R^{-1/2} L_\gamma^{1/2}\| \|U\| \quad (29)$$

$$\leq 1. \quad (30)$$

457 Now, we can move on to bound  $\|L_\gamma^{-1/2} (L - L_m) L_\gamma^{-1/2}\|$ . To do so, we can observe that, by  
 458 definition,

$$L_m = S_m S_m^* \quad (31)$$

$$= \frac{1}{n} \frac{1}{m} \sum_{i=1}^m \begin{bmatrix} \psi_i(t_1) \\ \vdots \\ \psi_i(t_n) \end{bmatrix} \begin{bmatrix} \psi_i(t_1) \\ \vdots \\ \psi_i(t_n) \end{bmatrix}^\top. \quad (32)$$

459 Moreover, due to linearity of expectation,

$$\mathbb{E}_\omega[L_m] = L. \quad (33)$$

460 We can therefore apply Proposition C.4, with  $p = m$ ,  $Q = L$ , and  $Q_p = L_m$ . Note that  $\text{Tr } L$  is the  
 461 trace of the normalized Gram matrix  $\frac{1}{n}K$  and hence is smaller or equal to  $\kappa^2$  under Assumption 4.1.  
 462 Lastly, the value of the constant  $\mathcal{F}_\infty(\gamma)$  in Proposition C.4 can be computed as follows:

$$\left\langle \frac{1}{\sqrt{n}} \begin{bmatrix} \psi_i(t_1) \\ \vdots \\ \psi_i(t_n) \end{bmatrix}, \frac{1}{\sqrt{n}} L_\gamma^{-1} \begin{bmatrix} \psi_i(t_1) \\ \vdots \\ \psi_i(t_n) \end{bmatrix} \right\rangle_{\mathbb{R}^n} \leq \frac{\alpha^2}{\gamma}. \quad (34)$$

463 Thus, we obtain, with probability at least  $1 - \delta$ ,

$$\|L_\gamma^{-1/2} (L - L_m) L_\gamma^{-1/2}\| \leq \frac{2 \log \frac{8\kappa^2}{\gamma\delta} (1 + \alpha^2/\gamma)}{3m} + \sqrt{\frac{2 \log \frac{8\kappa^2}{\gamma\delta} \alpha^2}{\gamma m}}. \quad (35)$$

464 To conclude the proof, we can bound  $\|L_{m,\gamma}^{-1/2}L_\gamma^{1/2}\|$ . By Proposition B.1, we have that

$$\|L_{m,\gamma}^{-1/2}L_\gamma^{1/2}\| \leq \frac{1}{(1-\beta)^{1/2}}, \quad \text{where } \beta = \lambda_{\max} \left[ L_\gamma^{-1/2}(L - L_m)L_\gamma^{-1/2} \right]. \quad (36)$$

465 According to Equation (33), we can apply Proposition C.4 and see that with probability at least  $1 - \delta$

$$\beta \leq \frac{2 \log \frac{8\kappa^2}{\gamma\delta}}{3m} + \sqrt{\frac{2 \log \frac{8\kappa^2}{\gamma\delta} \alpha^2}{\gamma m}} \leq 0.5 \quad (37)$$

466 provided that  $m \geq 8 \left( \frac{1}{3} + \frac{\alpha^2}{\gamma} \right) \log(\frac{8\alpha^2}{\gamma\delta})$ .  $\square$

467 **Proof of Theorem 4.4** In order to retrieve the main concentration result, we can consider the fol-  
468 lowing decomposition of the error on the posterior mean. By Cauchy-Schwarz inequality and Equa-  
469 tions (7) and (9),

$$|\tilde{\mu}_{\text{post}}(t^*) - \mu_{\text{post}}(t^*)| = \left| \left\langle L_{m,R}^{-1}S_m\tilde{\phi}(t^*) - L_R^{-1}Sk(t^*, \cdot), \frac{1}{\sqrt{n}}\mathbf{y} \right\rangle_{\mathbb{R}^n} \right| \quad (38)$$

$$\leq \nu \|L_{m,R}^{-1}S_m\tilde{\phi}(t^*) - L_{m,R}^{-1}Sk(t^*, \cdot) + L_{m,R}^{-1}Sk(t^*, \cdot) - L_R^{-1}Sk(t^*, \cdot)\|_2 \quad (39)$$

$$\leq \nu \|L_{m,R}^{-1}(S_m\tilde{\phi}(t^*) - Sk(t^*, \cdot))\|_2 + \nu \|(L_{m,R}^{-1} - L_R^{-1})Sk(t^*, \cdot)\|_2 \quad (40)$$

$$\leq \nu/\gamma \|S_m\tilde{\phi}(t^*) - Sk(t^*, \cdot)\|_2 + \nu \|(L_{m,R}^{-1} - L_R^{-1})Sk(t^*, \cdot)\|_2. \quad (41)$$

470 Now, we can upper bound the two norms appearing in the expression above. The first addend can be  
471 directly bounded by applying Corollary C.3. The second addend in Equation (41) can be bounded  
472 by Lemma B.4. Hence, we obtain the following bound with probability at least  $1 - \delta$ :

$$|\tilde{\mu}_{\text{post}}(t^*) - \mu_{\text{post}}(t^*)| \leq \nu/\gamma \|S_m\tilde{\phi}(t^*) - Sk(t^*, \cdot)\|_2 + \nu \|(L_{m,R}^{-1} - L_R^{-1})Sk(t^*, \cdot)\|_2 \quad (42)$$

$$\leq \sqrt{\frac{2\nu^2\alpha^4 \log \frac{2Tn}{\delta}}{m\gamma^2}} + \frac{\sqrt{2}\kappa\nu}{\sqrt{\gamma}} \left[ \frac{2 \log \frac{8\kappa^2}{\gamma\delta} (1 + \alpha^2/\gamma)}{3m} + \sqrt{\frac{2 \log \frac{8\kappa^2}{\gamma\delta} \alpha^2}{\gamma m}} \right]. \quad (43)$$

473 The final result for the vector-valued GP can be obtained by applying a union bound.

### 474 B.3 Proof of Theorem 4.5 (Deviation of Approximate Posterior Variance)

475 In this section, we prove our result related to the concentration of the approximate posterior variance.  
476 Again, we begin by stating some lemmas that will be used in the proof.

477 **Lemma B.5.** *Let  $\delta = (0, 1]$ . Then, the following bound holds, with probability at least  $1 - \delta$ ,*

$$|\langle Sk(t^*, \cdot) - S_m\tilde{\phi}(t^*), L_R^{-1}Sk(t^*, \cdot) \rangle_{\mathbb{R}^n}| \leq \sqrt{\frac{2\kappa^2\alpha^4 \log \frac{2Tn}{\delta}}{\gamma m}}. \quad (44)$$

478

479 *Proof.* By Cauchy-Schwarz,

$$|\langle Sk(t^*, \cdot) - S_m\tilde{\phi}(t^*), L_R^{-1}Sk(t^*, \cdot) \rangle_{\mathbb{R}^n}| \leq \|Sk(t^*, \cdot) - S_m\tilde{\phi}(t^*)\|_2 \|L_R^{-1}Sk(t^*, \cdot)\|_2. \quad (45)$$

480 By using the polar decomposition of  $S$ , for a suitable partial isometry operator  $U$ , and according  
 481 to Propositions B.1 and B.3

$$\|L_R^{-1}Sk(t^*, \cdot)\|_2 \leq \|L_R^{-1}(SS^*)^{1/2}U\| \|k(t^*, \cdot)\|_{\mathcal{H}} \quad (46)$$

$$\leq \kappa \|L_R^{-1}L^{1/2}\| \quad (47)$$

$$\leq \kappa \|L_R^{-1/2}\| \|L_R^{-1/2}L^{1/2}\| \quad (48)$$

$$\leq \frac{\kappa}{\sqrt{\gamma}} \|L_R^{-1/2}L_\gamma^{1/2}\| \|L_\gamma^{-1/2}L^{1/2}\| \quad (49)$$

$$\leq \frac{\kappa}{\sqrt{\gamma}} \|L_\gamma^{-1/2}L_\gamma^{1/2}\| \quad (50)$$

$$\leq \frac{\kappa}{\sqrt{\gamma}}. \quad (51)$$

482 To conclude the proof, we can observe that, according to Corollary C.3,

$$\|Sk(t^*, \cdot) - S_m\tilde{\phi}(t^*)\|_2 \leq \sqrt{\frac{2\alpha^4 \log \frac{2Tn}{\delta}}{m}}. \quad (52)$$

483

□

484 **Lemma B.6.** Let  $\delta = (0, 1]$ . Then, the following bound holds, with probability at least  $1 - \delta$ ,

$$|\langle S_m\tilde{\phi}(t^*), L_R^{-1}(Sk(t^*, \cdot) - S_m\tilde{\phi}(t^*)) \rangle_{\mathbb{R}^n}| \leq \frac{\alpha^2}{\gamma} \sqrt{\frac{2\alpha^4 \log \frac{2Tn}{\delta}}{m}}. \quad (53)$$

485

486 *Proof.* By Cauchy-Schwarz inequality and Proposition B.2,

$$|\langle S_m\tilde{\phi}(t^*), L_R^{-1}(Sk(t^*, \cdot) - S_m\tilde{\phi}(t^*)) \rangle_{\mathbb{R}^n}| \leq \|S_m\tilde{\phi}(t^*)\|_2 \|L_R^{-1}(Sk(t^*, \cdot) - S_m\tilde{\phi}(t^*))\|_2 \quad (54)$$

$$\leq \|S_m\| \|\tilde{\phi}(t^*)\|_2 \|L_R^{-1}(Sk(t^*, \cdot) - S_m\tilde{\phi}(t^*))\|_2 \quad (55)$$

$$\leq \frac{\alpha^2}{\gamma} \|Sk(t^*, \cdot) - S_m\tilde{\phi}(t^*)\|_2. \quad (56)$$

487 Now, we can again observe that, according to Corollary C.3,

$$\|Sk(t^*, \cdot) - S_m\tilde{\phi}(t^*)\|_2 \leq \sqrt{\frac{2\alpha^4 \log \frac{2Tn}{\delta}}{m}}, \quad (57)$$

488 which concludes the proof. □

489 **Lemma B.7.** Let  $m \geq 8 \left( \frac{1}{3} + \frac{\alpha^2}{\gamma} \right) \log \left( \frac{8\alpha^2}{\gamma\delta} \right)$ , and  $\delta = (0, 1]$ . Then, the following bound holds, with  
 490 probability at least  $1 - \delta$ ,

$$|\langle S_m\tilde{\phi}(t^*), (L_R^{-1} - L_{m,R}^{-1})S_m\tilde{\phi}(t^*) \rangle_{\mathbb{R}^n}| \leq \frac{\alpha^3\sqrt{2}}{\sqrt{\gamma}} \left[ \frac{2 \log \frac{8\kappa^2}{\gamma\delta} (1 + \alpha^2/\gamma)}{3m} + \sqrt{\frac{2 \log \frac{8\kappa^2}{\gamma\delta} \alpha^2}{\gamma m}} \right]. \quad (58)$$

491

492 *Proof.* Firstly, we can observe that, by Cauchy-Schwarz inequality, Propositions B.2 and B.3, the  
 493 polar decomposition of  $S_m$ , and the fact that  $L_m \preceq L_{m,\gamma}$  by definition, we have that

$$|\langle S_m \tilde{\phi}(t^*), (L_R^{-1} - L_{m,R}^{-1}) S_m \tilde{\phi}(t^*) \rangle_{\mathbb{R}^n}| = |\langle S_m \tilde{\phi}(t^*), L_{m,R}^{-1} (L - L_m) L_R^{-1} S_m \tilde{\phi}(t^*) \rangle_{\mathbb{R}^n}| \quad (59)$$

$$= |\langle L_{m,R}^{-1/2} S_m \tilde{\phi}(t^*), L_{m,R}^{-1/2} (L - L_m) L_R^{-1} S_m \tilde{\phi}(t^*) \rangle_{\mathbb{R}^n}| \quad (60)$$

$$\leq \|L_{m,R}^{-1/2} S_m \tilde{\phi}(t^*)\|_2 \|L_{m,R}^{-1/2} (L - L_m) L_R^{-1} S_m \tilde{\phi}(t^*)\|_2 \quad (61)$$

$$\leq \alpha^3 \|L_{m,R}^{-1/2} (S_m S_m^*)^{1/2} U\| \|L_{m,R}^{-1/2} L_{m,\gamma}^{1/2} L_{m,\gamma}^{-1/2} (L - L_m) L_R^{-1} S_m \tilde{\phi}(t^*)\|_2 \quad (62)$$

$$\leq \alpha^3 \|L_{m,R}^{-1/2} L_{m,\gamma}^{1/2}\| \|L_{m,\gamma}^{-1/2} L_{m,\gamma}^{1/2}\| \|L_{m,\gamma}^{-1/2} (L - L_m) L_{m,\gamma}^{1/2}\| \|L_{m,\gamma}^{1/2} L_R^{-1/2}\| \|L_R^{-1/2}\| \quad (63)$$

$$\leq \frac{\alpha^3}{\sqrt{\gamma}} \|L_{m,\gamma}^{-1/2} L_{m,\gamma}^{1/2}\| \|L_{m,\gamma}^{-1/2} (L - L_m) L_{m,\gamma}^{1/2}\|. \quad (64)$$

494 Now, we can bound the two factors. According to Propositions B.1 and C.4, with probability at least  
 495  $1 - \delta$ , for  $\delta \in (0, 1]$  and  $m \geq 8 \left( \frac{1}{3} + \frac{\alpha^2}{\gamma} \right) \log \left( \frac{8\alpha^2}{\gamma\delta} \right)$ , we have that

$$\|L_{m,\gamma}^{-1/2} L_{m,\gamma}^{1/2}\| \|L_{m,\gamma}^{-1/2} (L_{m,\gamma} - L_m) L_{m,\gamma}^{1/2}\| \leq \sqrt{2} \left[ \frac{2 \log \frac{8\kappa^2}{\gamma\delta} (1 + \alpha^2/\gamma)}{3m} + \sqrt{\frac{2 \log \frac{8\kappa^2}{\gamma\delta} \alpha^2}{\gamma m}} \right], \quad (65)$$

496 concluding the proof.  $\square$

497 **Proof of Theorem 4.5** We are now ready to prove Theorem 4.5. According to Equations (8)  
 498 and (10), and similarly to what we did for the posterior mean, we can decompose the error on the  
 499 variance of a single DOF as follows:

$$|\sigma_{\text{post}}^2(t^*) - \sigma_{\text{post}}^2(t^*)| = |k(t^*, t^*) - \langle Sk(t^*, \cdot), L_R^{-1} Sk(t^*, \cdot) \rangle_{\mathbb{R}^n} - \tilde{k}(t^*, t^*) + \langle S_m \tilde{\phi}(t^*), L_{m,R}^{-1} S_m \tilde{\phi}(t^*) \rangle_{\mathbb{R}^n}| \quad (66)$$

$$\leq |k(t^*, t^*) - \tilde{k}(t^*, t^*)| + |\langle Sk(t^*, \cdot), L_R^{-1} Sk(t^*, \cdot) \rangle_{\mathbb{R}^n} - \langle S_m \tilde{\phi}(t^*), L_{m,R}^{-1} S_m \tilde{\phi}(t^*) \rangle_{\mathbb{R}^n}| \quad (67)$$

$$\leq |k(t^*, t^*) - \tilde{k}(t^*, t^*)| + |\langle Sk(t^*, \cdot) - S_m \tilde{\phi}(t^*), L_R^{-1} Sk(t^*, \cdot) \rangle_{\mathbb{R}^n}| + |\langle S_m \tilde{\phi}(t^*), L_R^{-1} Sk(t^*, \cdot) - L_{m,R}^{-1} S_m \tilde{\phi}(t^*) \rangle_{\mathbb{R}^n}| \quad (68)$$

$$\leq |k(t^*, t^*) - \tilde{k}(t^*, t^*)| + |\langle Sk(t^*, \cdot) - S_m \tilde{\phi}(t^*), L_R^{-1} Sk(t^*, \cdot) \rangle_{\mathbb{R}^n}| + |\langle S_m \tilde{\phi}(t^*), L_R^{-1} (Sk(t^*, \cdot) - S_m \tilde{\phi}(t^*)) \rangle_{\mathbb{R}^n}| + |\langle S_m \tilde{\phi}(t^*), (L_R^{-1} - L_{m,R}^{-1}) S_m \tilde{\phi}(t^*) \rangle_{\mathbb{R}^n}|. \quad (69)$$

500 Now, we can upper bound the four addends appearing in the decomposition above. The first addend  
 501 can be directly bounded by Corollary C.2. The second addend of the decomposition in Equation (69)  
 502 can be bounded by Lemma B.5. The third addend in Equation (69) can be bounded by Lemma B.6.  
 503 The last addend in Equation (69) can be bounded by Lemma B.7. In this way, we retrieve the result  
 504 of Theorem 4.5, obtaining the following bound holding with probability at least  $1 - \delta$ . Having defined

$$C := \sqrt{\frac{2\alpha^4 \log \frac{2T}{\delta}}{m}} + \sqrt{\frac{2\kappa^2 \alpha^4 \log \frac{2Tn}{\delta}}{\gamma m}} + \frac{\alpha^2}{\gamma} \sqrt{\frac{2\alpha^4 \log \frac{2Tn}{\delta}}{m}} + \frac{\alpha^3 \sqrt{2}}{\sqrt{\gamma}} \left[ \frac{2 \log \frac{8\kappa^2}{\gamma \delta} (1 + \alpha^2/\gamma)}{3m} + \sqrt{\frac{2 \log \frac{8\kappa^2}{\gamma \delta} \alpha^2}{\gamma m}} \right].$$

$$\begin{aligned} |\sigma_{\text{post}}^2(t^*) - \sigma_{\text{post}}^2(t^*)| &\leq |\langle k(t^*, \cdot), k(t^*, \cdot) \rangle_{\mathcal{H}} - \langle \tilde{\phi}(t^*), \tilde{\phi}(t^*) \rangle_{\mathbb{R}^m}| \\ &\quad + |\langle Sk(t^*, \cdot) - S_m \tilde{\phi}(t^*), L_R^{-1} Sk(t^*, \cdot) \rangle_{\mathbb{R}^n}| \\ &\quad + |\langle S_m \tilde{\phi}(t^*), L_R^{-1} (Sk(t^*, \cdot) - S_m \tilde{\phi}(t^*)) \rangle_{\mathbb{R}^n}| \\ &\quad + |\langle S_m \tilde{\phi}(t^*), (L_R^{-1} - L_{m,R}^{-1}) S_m \tilde{\phi}(t^*) \rangle_{\mathbb{R}^n}| \end{aligned} \quad (70)$$

$$\leq C. \quad (71)$$

The final result for the vector-valued GP can be obtained by applying a union bound.

## C Concentration Results

We first provide a few lemmas for the concentration of the approximate kernel functions that derive from Hoeffding inequality, and then a lemma for the concentration of random operators that derives from Bernstein inequality. Again, we denote by  $A_\gamma$  the operator  $A + \gamma I$ .  $\|\cdot\|$  denotes the operator norm, while  $\|\cdot\|_2$  denotes the Euclidean norm of a vector.

### C.1 Approximation of the Kernel Function

Note that if a *uniform* convergence of the RF-HGP posterior is sought w.r.t. the domain of the function modelled with the HGP, our proofs could be adapted by replacing the following Lemma C.1 with a uniform convergence result. For instance, in the case of RFFs, such a result can be found in [17, Claim 1].

**Lemma C.1.** *Let  $\delta = (0, 1]$ . Then, for any  $(t_1, t_2)$  it holds with probability at least  $1 - \delta$ , it holds*

$$\left| \tilde{\phi}(t_1)^T \tilde{\phi}(t_2) - k(t_1, t_2) \right| \leq \sqrt{\frac{2\alpha^4 \log \frac{2}{\delta}}{m}}, \quad \forall t_1, t_2 \in \mathcal{X}. \quad (72)$$

*Proof.* To upper bound the quantity of interest, we can use Hoeffding's inequality for bounded random variables. Let  $A_j(t_1, t_2) := \psi_j(t_1)\psi_j(t_2) - \mathbb{E}_\omega \psi(\omega, t_1)\psi(\omega, t_2)$ . Since  $-\alpha^2 \leq \psi_j(t_1)\psi_j(t_2) \leq \alpha^2$  according to Assumption 4.2, by Hoeffding inequality, we have that

$$\Pr \left\{ \frac{1}{m} \left| \sum_{j=1}^m A_j(t_1, t_2) \right| \geq \frac{t}{m} \right\} \leq 2e^{-\frac{2t^2}{4m\alpha^4}}. \quad (73)$$

Therefore, by setting the above upper bound smaller than  $\delta$ , for  $\delta \in (0, 1]$ , we get that with probability at least  $1 - \delta$

$$\left| \tilde{\phi}(t_1)^T \tilde{\phi}(t_2) - k(t_1, t_2) \right| = \frac{1}{m} \left| \sum_{j=1}^m A_j(t_1, t_2) \right| \leq \sqrt{\frac{2\alpha^4 \log \frac{2}{\delta}}{m}}. \quad (74)$$

□

**Corollary C.2.** *Let  $\delta = (0, 1]$ . Then with probability at least  $1 - \delta$ , it holds*

$$\left| \tilde{\phi}(t^*)^T \tilde{\phi}(t^*) - k(t^*, t^*) \right| \leq \sqrt{\frac{2\alpha^4 \log \frac{2|\mathcal{T}|}{\delta}}{m}}, \quad \forall t^* \in \mathcal{T}. \quad (75)$$

*Proof.* We apply Lemma C.1 on each element of  $\mathcal{T}$  with  $\delta' := \delta/T$ . The claimed result then follows using a union bound. □

527 **Corollary C.3.** Let  $\delta = (0, 1]$ . Then with probability at least  $1 - \delta$ ,

$$\|S_m \tilde{\phi}(t^*) - Sk(t^*, \cdot)\|_2 \leq \sqrt{\frac{2\alpha^4 \log \frac{2Tn}{\delta}}{m}}, \quad \forall t^* \in \mathcal{T}. \quad (76)$$

528 *Proof.* It holds

$$\|S_m \tilde{\phi}(t^*) - Sk(t^*, \cdot)\|_2^2 = \frac{1}{n} \sum_{i=1}^n [\tilde{\phi}(t_i)^T \tilde{\phi}(t^*) - k(t_i, t^*)]^2 \quad (77)$$

529 The result thus follows from applying  $nT$  times Lemma C.1 on the pairs  $((t_i, t^*))_{1 \leq i \leq n, t^* \in \mathcal{T}}$  with  
530 probability  $\delta' := \delta/(nd)$  and using a union bound.  $\square$

## 531 C.2 Concentration of the Kernel matrix

532 The following result derives from the Bernstein inequality for sums of random operators on separable  
533 Hilbert spaces in operator norm.

534 **Proposition C.4** (Proposition 6 and Remark 10 of [25]). Let  $\mathbf{v}_1, \dots, \mathbf{v}_p$  with  $p \geq 1$ , be independent  
535 and identically distributed random vectors on a separable Hilbert spaces  $\mathcal{H}$  such that  $Q = \mathbb{E} \mathbf{v} \otimes \mathbf{v}$   
536 is trace-class, and for any  $\lambda > 0$  there exists a constant  $\mathcal{F}_\infty(\lambda) < \infty$  such that  $\langle \mathbf{v}, (Q + \lambda I)^{-1} \mathbf{v} \rangle \leq$   
537  $\mathcal{F}_\infty(\lambda)$  almost everywhere. Let  $Q_p = \frac{1}{p} \sum_{i=1}^p \mathbf{v}_i \otimes \mathbf{v}_i$  and take  $0 < \lambda \leq \|Q\|$ . Then for any  $\delta \geq 0$ ,  
538 the following holds with probability at least  $1 - \delta$ :

$$\|Q_\lambda^{-1/2}(Q - Q_p)Q_\lambda^{-1/2}\| \leq \frac{2w(1 + \mathcal{F}_\infty(\lambda))}{3p} + \sqrt{\frac{2w\mathcal{F}_\infty(\lambda)}{p}} \quad (78)$$

539 where  $w = \log \frac{8 \text{Tr } Q}{\lambda \delta}$ . Moreover, with the same probability,

$$\lambda_{\max} [Q_\lambda^{-1/2}(Q - Q_p)Q_\lambda^{-1/2}] \leq \frac{2w}{3p} + \sqrt{\frac{2w\mathcal{F}_\infty(\lambda)}{p}}. \quad (79)$$

540 Moreover, for any  $s \in (0, 1]$ , if  $\|\mathbf{v}_i\| \leq \alpha$ , we have that, with probability at least  $1 - \delta$ ,

$$\lambda_{\max} [Q_\lambda^{-1/2}(Q - Q_p)Q_\lambda^{-1/2}] \leq s. \quad (80)$$

541 provided that  $p \geq \frac{2}{t^2} \left[ \frac{2t}{3} + \mathcal{F}_\infty(\gamma) \right] \log \frac{8\alpha^2}{\lambda \delta}$  and  $\lambda \leq \|Q\|$ .

## 542 D Efficient Matrix Inversion and Online Updates

543 In this section, we show how the expression of the posterior mean and variance can easily be updated  
544 when adding new samples to the dataset.

545 We recall that the operators  $S_m$  and  $L_{m,R}$  are matrices and are defined in Appendix A. As discussed  
546 in Appendix A, the inversion of  $L_{m,R}$ , involved the posteriors of Equations (9) and (10), can be  
547 simplified by applying Woodbury identity [29], as follows:

$$L_{m,R}^{-1} = (S_m S_m^* + R)^{-1} \quad (81)$$

$$= R^{-1} - R^{-1} S_m (I + S_m^* R^{-1} S_m)^{-1} S_m^* R^{-1}. \quad (82)$$

548 The posterior mean of the HGP in Equation (9) becomes:

$$\tilde{\mu}_{\text{post}}(t^*) = \langle [R^{-1} - R^{-1} S_m (I + S_m^* R^{-1} S_m)^{-1} S_m^* R^{-1}] S_m \tilde{\phi}(t^*), \frac{1}{\sqrt{n}} \mathbf{y} \rangle_{\mathbb{R}^n} \quad (83)$$

$$= \tilde{\phi}(t^*)^T [I - S_m^* R^{-1} S_m (I + S_m^* R^{-1} S_m)^{-1}] S_m^* R^{-1} \frac{1}{\sqrt{n}} \mathbf{y} \quad (84)$$

$$= \tilde{\phi}(t^*)^T [I - B(I + B)^{-1}] A \quad (85)$$



549 where  $A := \frac{1}{\sqrt{n}} S_m^* R^{-1} \mathbf{y} \in \mathbb{R}^m$  and  $B := S_m^* R^{-1} S_m \in \mathbb{R}^{m \times m}$ . Moreover, the only term in the  
 550 expression of the posterior variance of Equation (10)

$$\tilde{\sigma}_{\text{post}}^2(t^*) = \langle \tilde{\phi}(t^*), \tilde{\phi}(t^*) \rangle_{\mathbb{R}^m} + n r_{t^*} - \langle S_m \tilde{\phi}(t^*), (L_m + R)^{-1} S_m \tilde{\phi}(t^*) \rangle_{\mathbb{R}^n} \quad (86)$$

551 which varies with  $n$  is

$$\langle S_m \tilde{\phi}(t^*), (L_m + R)^{-1} S_m \tilde{\phi}(t^*) \rangle_{\mathbb{R}^n} \quad (87)$$

$$= \tilde{\phi}^T(t^*) [S_m^* R^{-1} S_m - S_m^* R^{-1} S_m (I + S_m^* R^{-1} S_m)^{-1} S_m^* R^{-1} S_m] \tilde{\phi}(t^*), \quad (88)$$

$$= \tilde{\phi}^T(t^*) [B - B(I + B)^{-1} B] \tilde{\phi}(t^*). \quad (89)$$

552 When a new human demonstration is gathered, the training set is enlarged by adding  $n_{\text{new}}$  training  
 553 points. This means that the matrix  $S_m$  is updated by adding  $n_{\text{new}}$  rows (and renormalized), contain-  
 554 ing the RF embeddings of the new training points. The same happens to vector  $\mathbf{y}$  and to the diagonal  
 555 matrix  $R$ , which is enlarged by adding  $n_{\text{new}}$  rows and columns. This means that matrices  $A$  and  $B$   
 556 support online updates. In particular, after initializing  $A$  and  $B$  to the null matrix, having collected  
 557 the new embeddings in  $S_{m,\text{new}} \in \mathbb{R}^{n_{\text{new}} \times m}$  (with normalization  $n_{\text{new}}^{-1/2}$ ) and the new noise variance  
 558 values in  $R_{\text{new}} \in \mathbb{R}^{n_{\text{new}} \times n_{\text{new}}}$  (with normalization  $n_{\text{new}}^{-1}$ ), the updates are as follows:

$$A \leftarrow A + \frac{1}{\sqrt{n_{\text{new}}}} S_{m,\text{new}}^* R_{\text{new}}^{-1} \mathbf{y}_{\text{new}} \quad (90)$$

$$B \leftarrow B + S_{m,\text{new}}^* R_{\text{new}}^{-1} S_{m,\text{new}}. \quad (91)$$

559 Having computed the updates, the matrices appearing in the posterior mean and variance can be  
 560 computed in constant time w.r.t. the current size of the training set during the data streaming.
